# Supplementary material for: High resolution imaging reveals heterogeneity in chromatin states between cells that is not inherited through cell division
Source: PubMed Central journal article supplement (PMC5016949; doi:10.1186/s12860-016-0111-y), 2016-09-08
Supplement: 12860_2016_111_MOESM1_ESM.pdf [file 12860_2016_111_MOESM1_ESM.pdf]

### Mean error of colocalizing strain videos aligned with independently acquired mean offsets

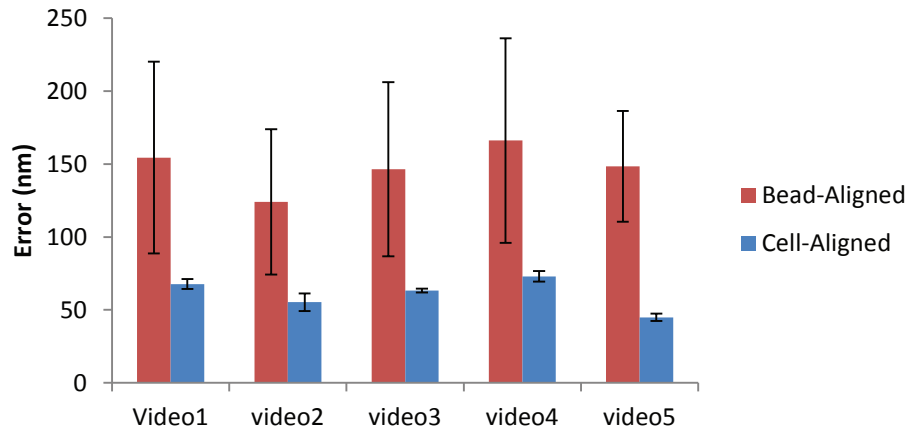

### 25.3kb

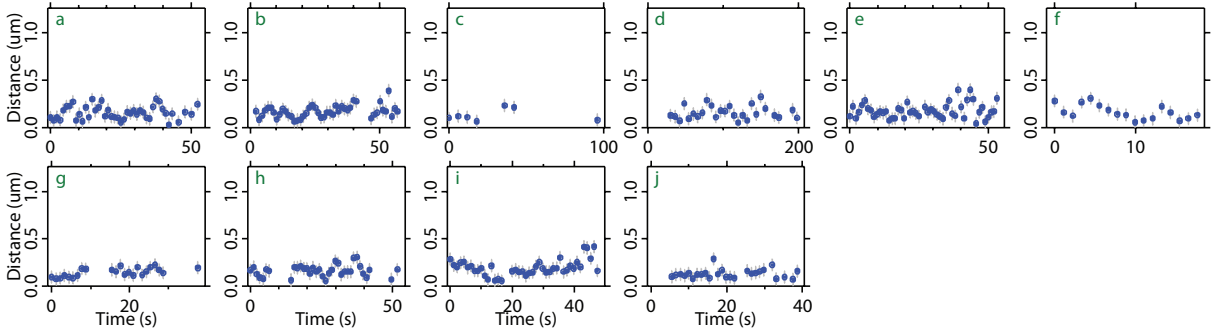

### 42.3kb

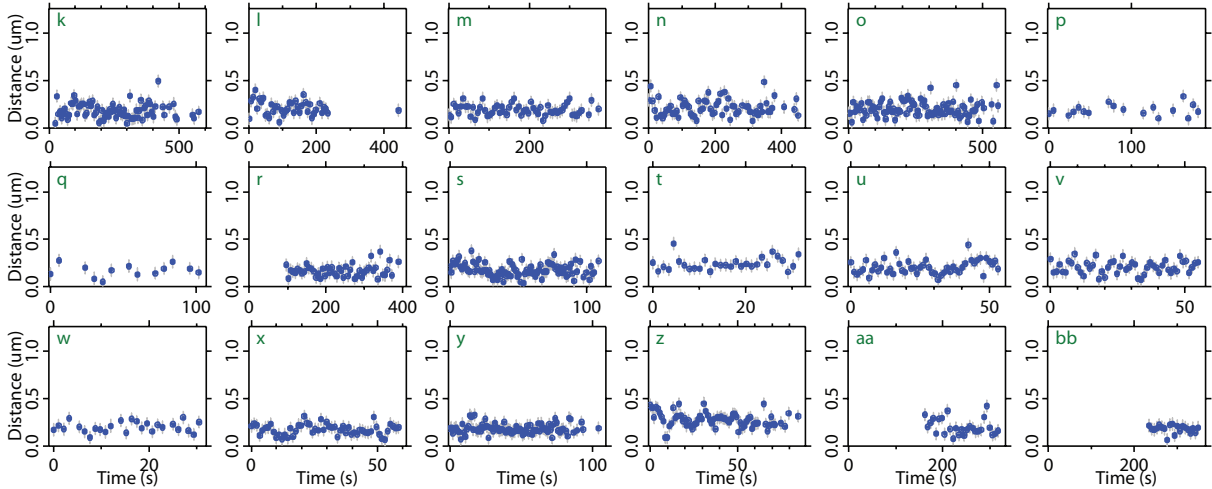

### 51.3kb

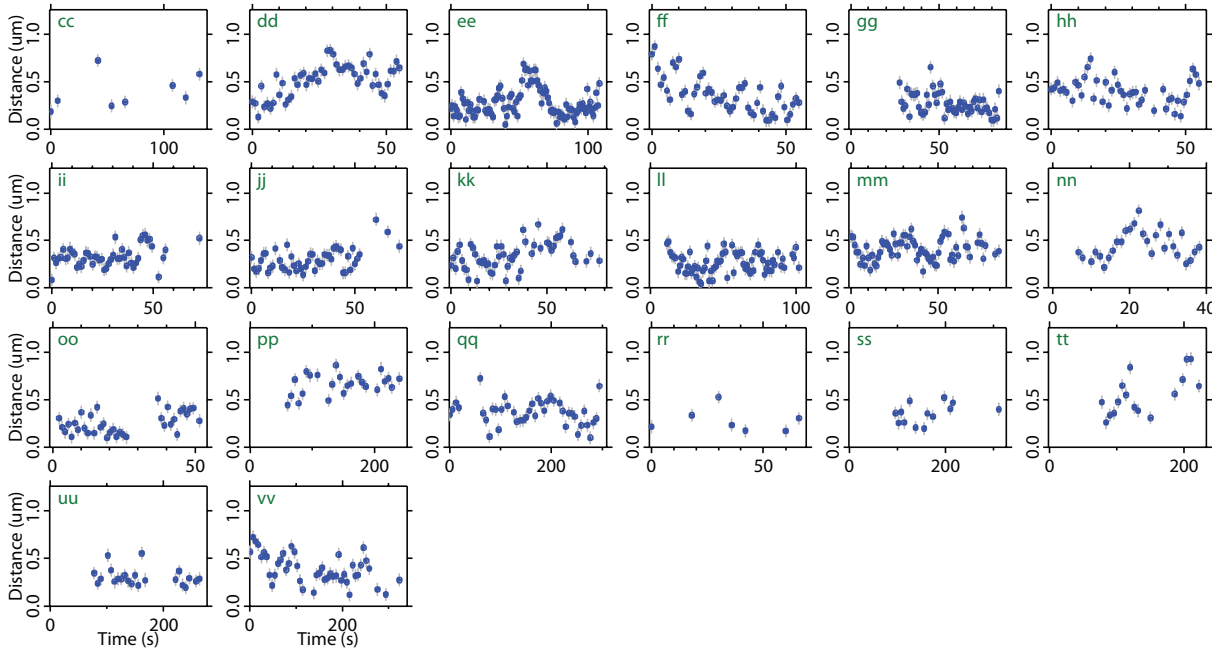

64.8kb

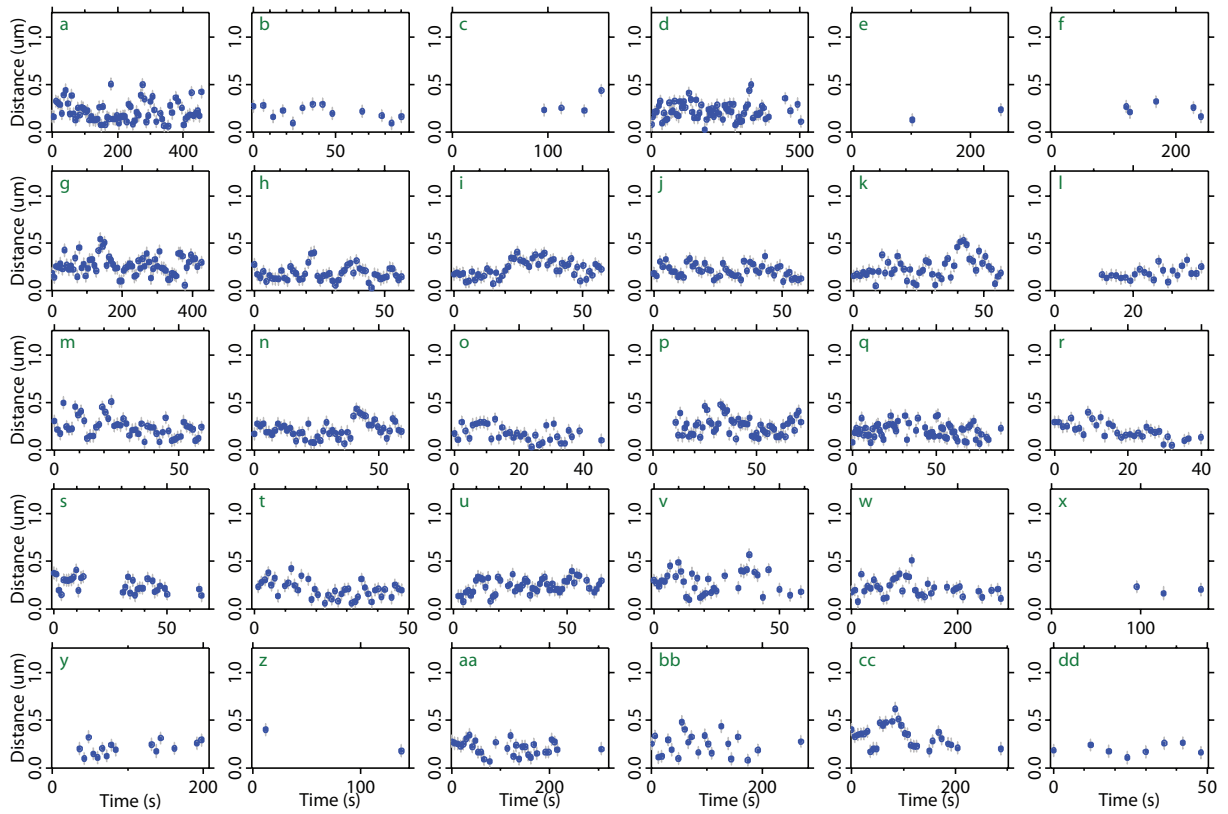

70.6kb

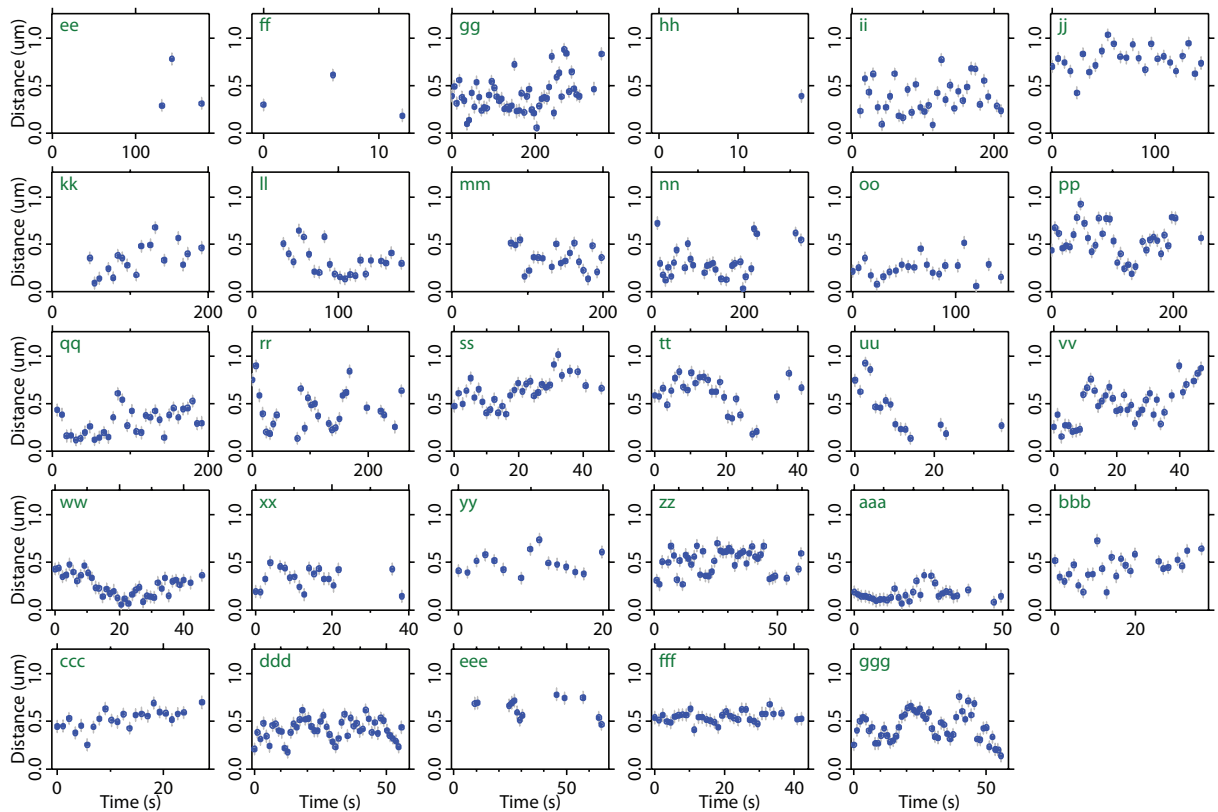

71kb

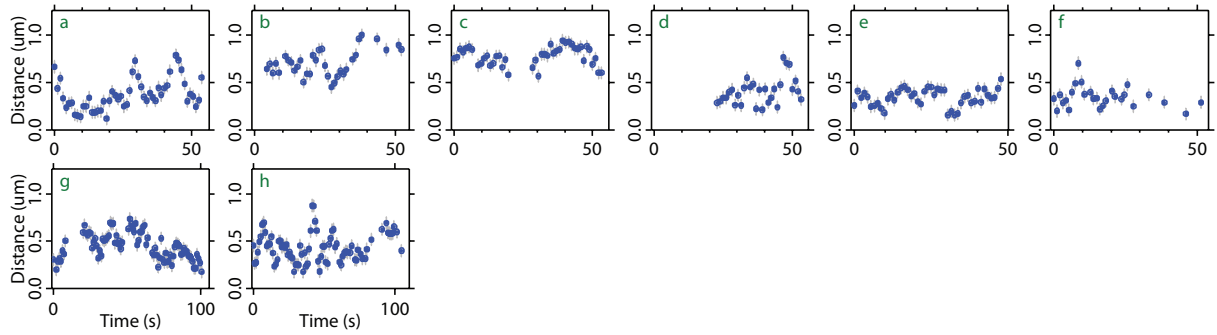

100.8kb

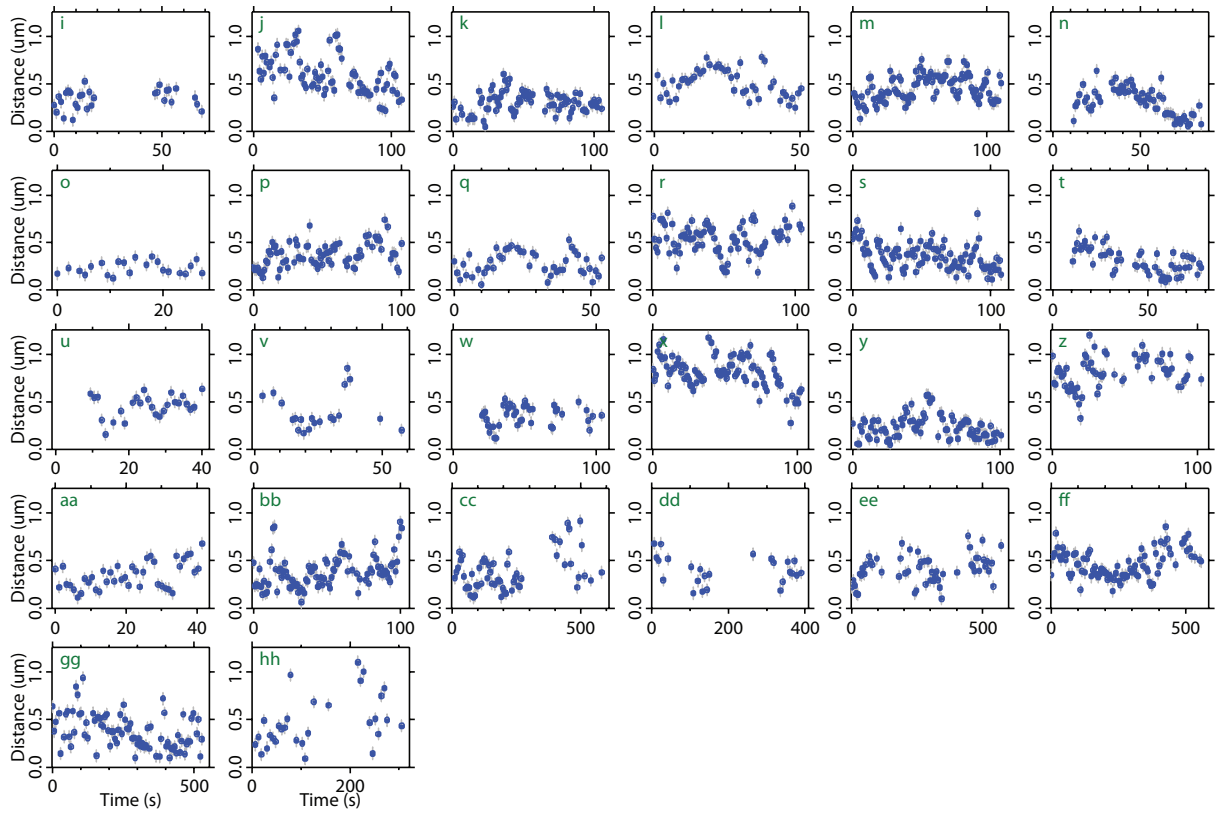

## Coloc

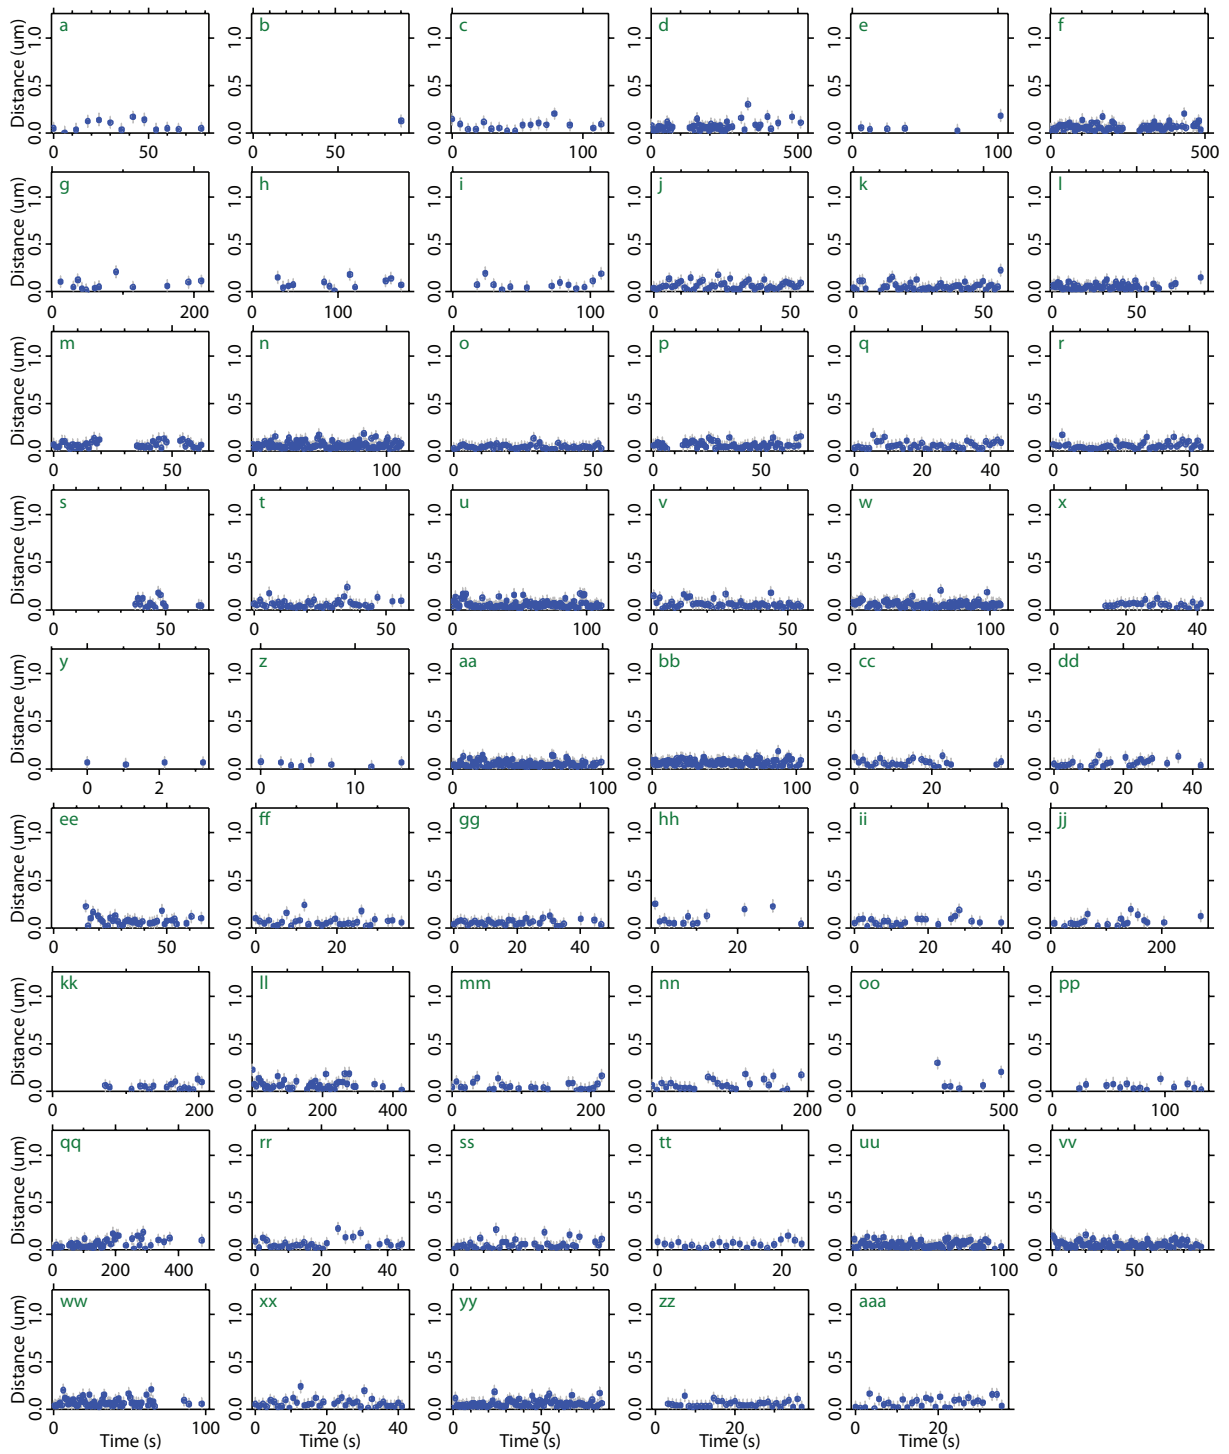

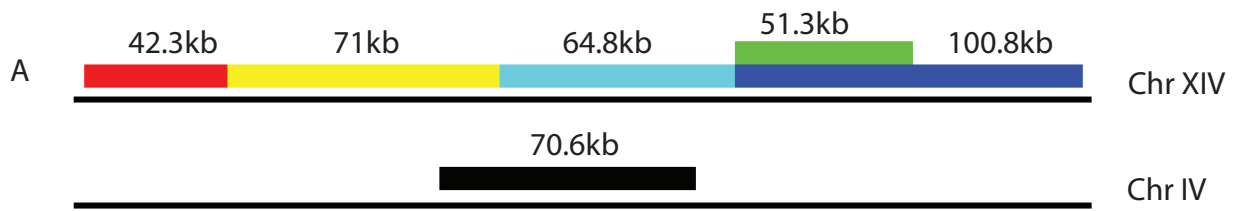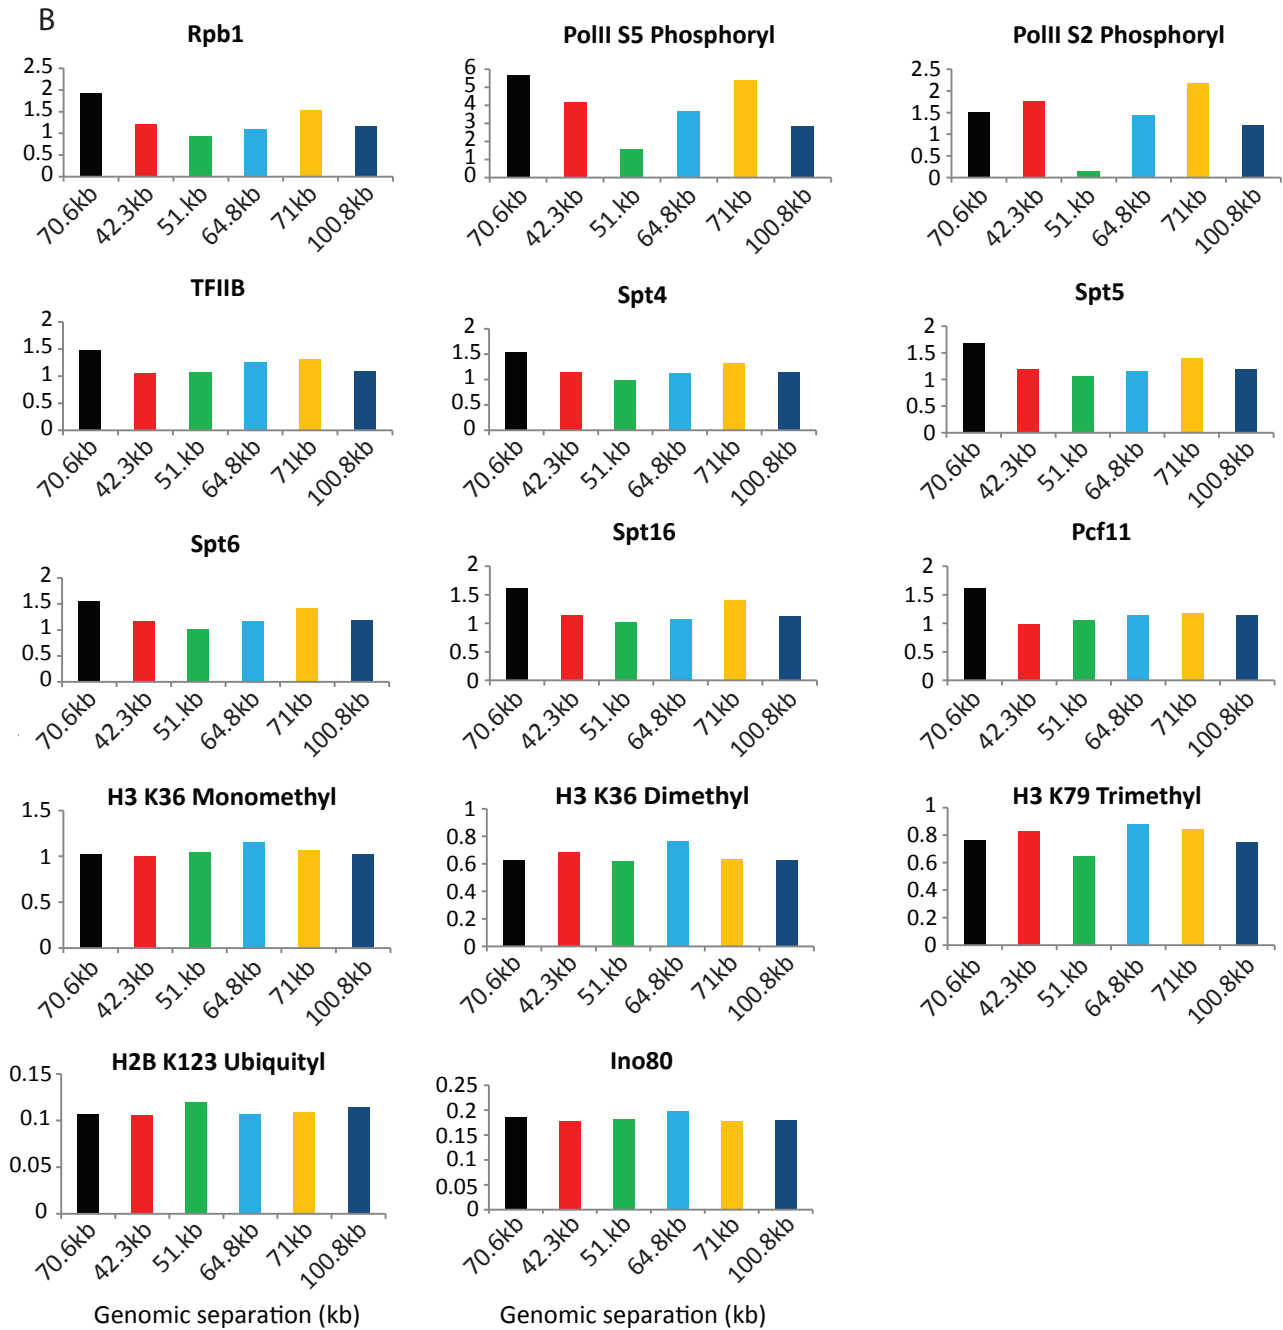

3D MSD, spots analyzed independently

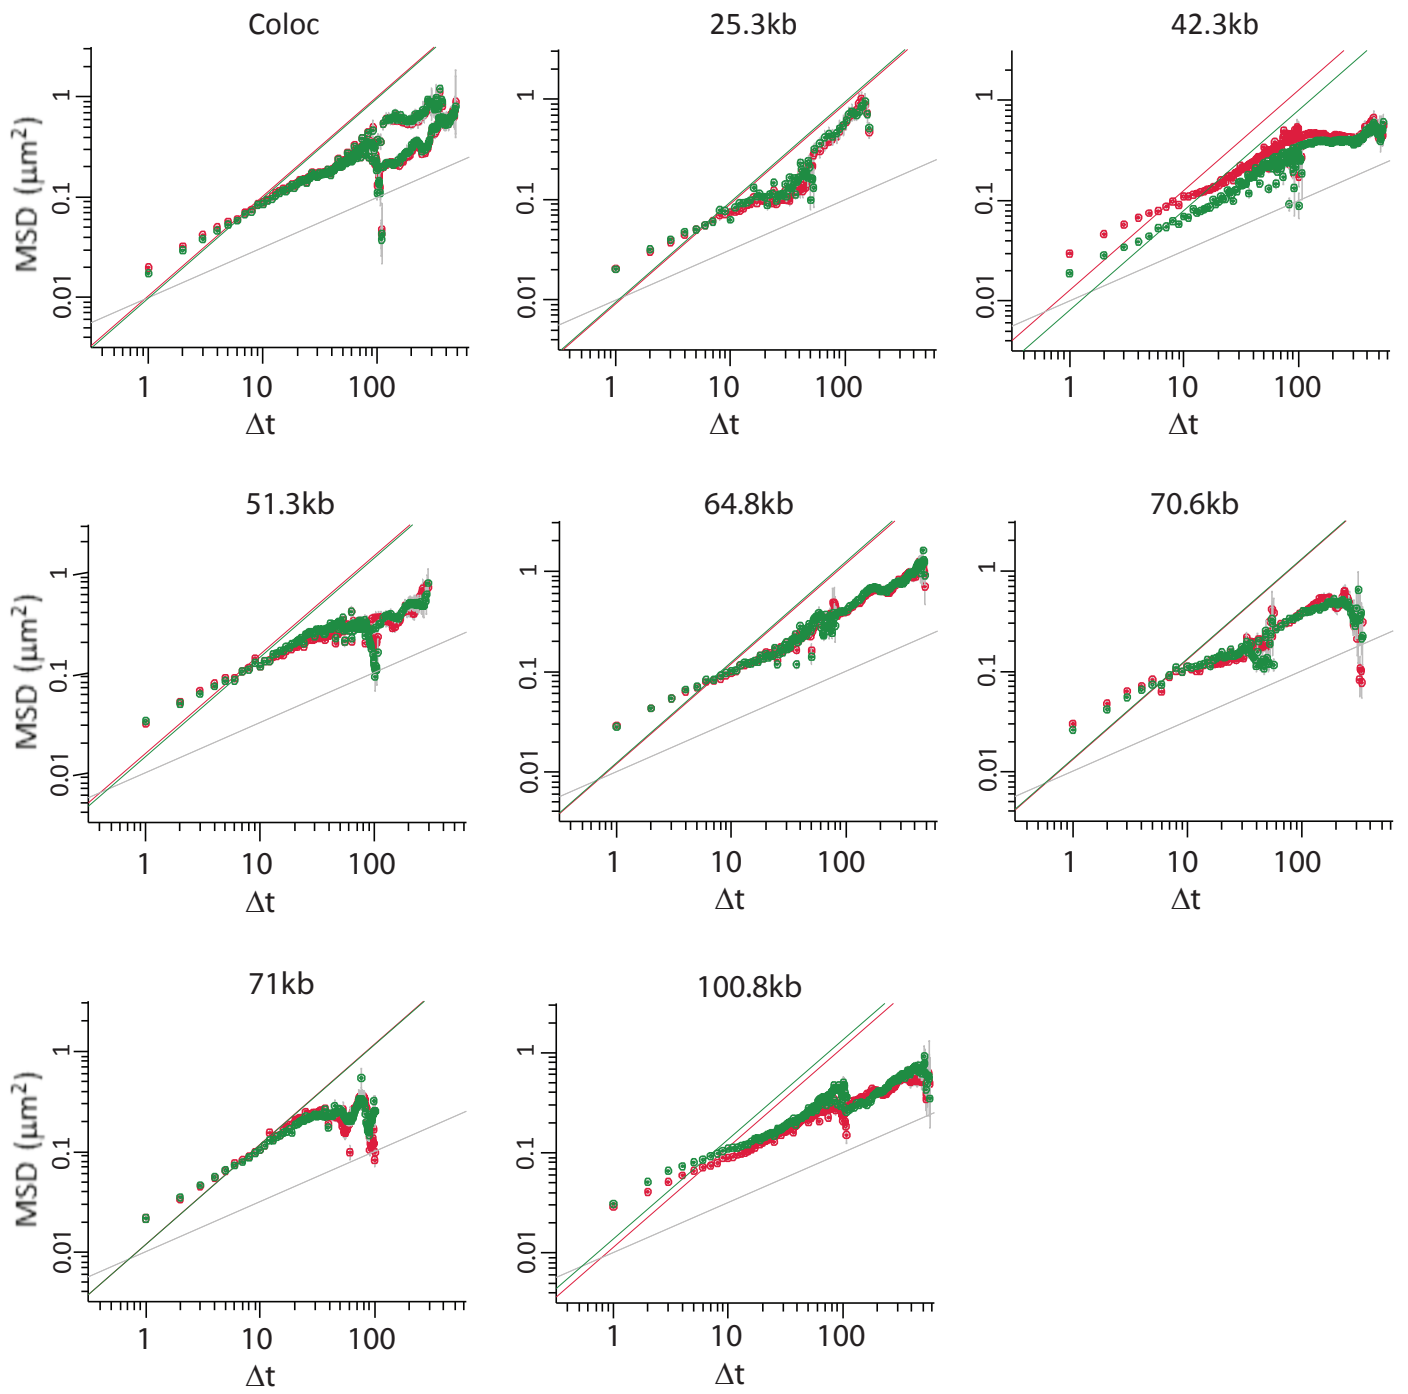

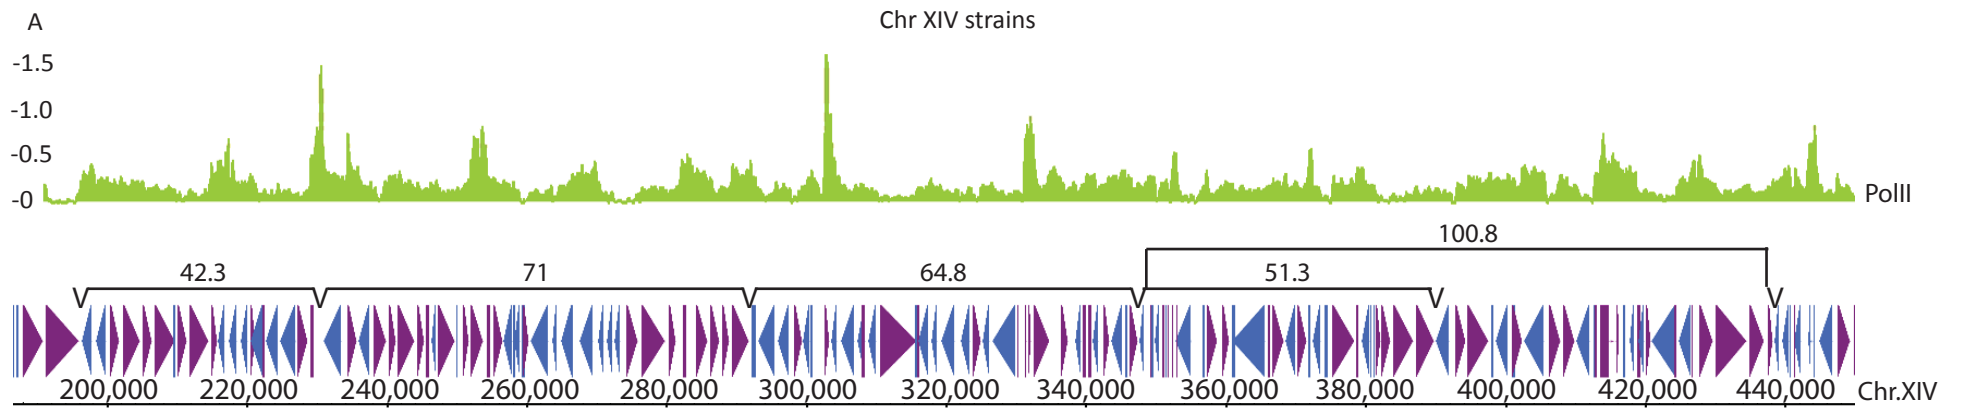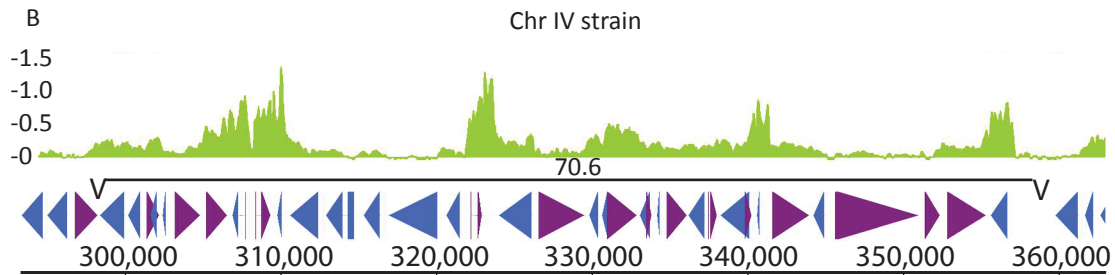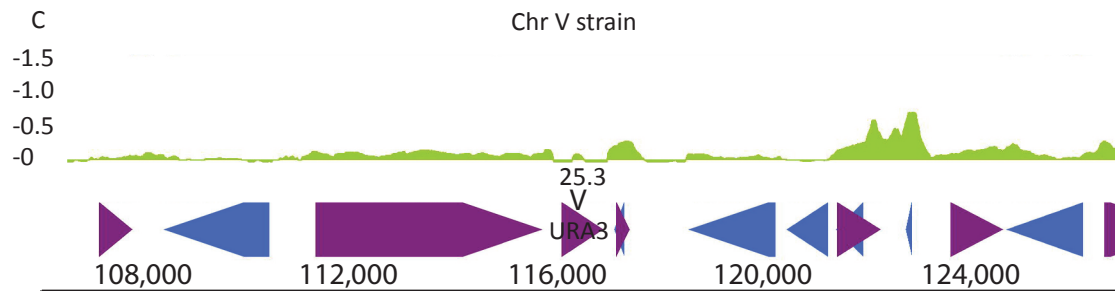



Fig. S1. Two step channel alignment improves resolution.

Channel alignment has traditionally been performed using multispectral beads of dimensions smaller than the PSF. Stacks of 100 nm Tetraspeck bead images in separate channels were analysed using Softworx alignment software to calculate rotational, translational, tilt, and magnification offsets. When colocalising strain videos were aligned following this protocol the mean measured distance between the tagged loci was calculated to be 110 nm. Including the fine-tuning step reduced the mean error to 63 nm. Error bars are standard deviation.

Figure S2 Distance verses time plots

For individual videos acquired in this study, spot separation distance in  $\mu\text{m}$  is plotted against time in seconds. Graphs are grouped by strain as indicated.

Figure S3 Chromatin composition at reporter loci.

High-resolution ChIP profiling enrichments for the chromatin constituents indicated across the loci studied. Rpb1, PolIII Ser2P, PolIII Ser5P, Pcf11, Spt4, Spt5, Spt6, Spt16, and TFIIB data were generated by [1]. Histone H3 K36 monomethylation, K36 dimethylation, and K79 trimethylation data were generated by [2]. Histone H2B K123 ubiquitylation data were generated by [3]. Ino80 data were generated by [4].

Figure S4 MSD curves for operators flanking each reporter locus.

Mean square displacement is plotted for the fluorescently tagged operator sequences flanking each

locus used. Data for the GFP tagged *lacI* are shown in green and mCherry tetR in red. Data from movies taken over different time scales is combined. The grey line indicates the profile anticipated for anomalous diffusion,  $MSD(\Delta t) \propto \Delta t^{1/2}$  [5]. The green and red lines show the best-fitting lines of Brownian diffusion,  $MSD(\Delta t) \propto \Delta t$ .

#### Figure S5 PolIII enrichment at tetO and lacO array integration sites on Chr XIV

Enrichment of PolIII subunit Rpb3 along the relevant loci is shown in green [6]. Integration sites of arrays of bacterial repressor binding sites are indicated by down carats ('V'). Locations of open reading frames, as well as their position on Watson or Crick strands, are indicated by blue and purple arrows. (A) All lacO and tetO arrays on Chr XIV were integrated between convergent genes and the terminators of the convergent genes were duplicated such that each copy flanked the insertion site. In this way all genes retained wild type copies of their terminators after insertion. (B) PolIII enrichments at the integration sites of the 70.6kb strain. TetO array was integrated between YDL089w and YDL088c, and lacO array was integrated between YDL055c and YDL054c. (C) PolIII enrichments at the integration sites of the 25.3kb strain. This strain is flanked by the *ura3-1* point mutant and wild type URA3.

1. Mayer A, Heidemann M, Lidschreiber M, Schrieck A, Sun M, Hintermair C, Kremmer E, Eick D, Cramer P: CTD tyrosine phosphorylation impairs termination factor recruitment to RNA polymerase II. *Science* 2012, 336(6089):1723-1725.
2. Weiner A, Hsieh TH, Appleboim A, Chen HV, Rahat A, Amit I, Rando OJ, Friedman N: High-resolution chromatin dynamics during a yeast stress response. *Mol Cell* 2015, 58(2):371-386.
3. Bonnet J, Wang CY, Baptista T, Vincent SD, Hsiao WC, Stierle M, Kao CF, Tora L, Devys D: The SAGA coactivator complex acts on the whole transcribed genome and is required for RNA polymerase II transcription. *Genes Dev* 2014, 28(18):1999-2012.
4. Yen K, Vinayachandran V, Batta K, Koerber RT, Pugh BF: Genome-wide nucleosome specificity and directionality of chromatin remodelers. *Cell* 2012, 149(7):1461-1473.
5. Qian H, Sheetz MP, Elson EL: Single particle tracking. Analysis of diffusion and flow in two-dimensional systems. *Biophys J* 1991, 60(4):910-921.

6. Mayer A, Lidschreiber M, Siebert M, Leike K, Soding J, Cramer P: Uniform transitions of the general RNA polymerase II transcription complex. *Nat Struct Mol Biol* 2010, 17(10):1272-1278.
