# Supplementary material for: High resolution imaging reveals heterogeneity in chromatin states between cells that is not inherited through cell division
Source: PubMed Central journal article supplement (PMC5016949; doi:10.1186/s12860-016-0111-y), 2016-09-08
Supplement: 12860_2016_111_MOESM2_ESM.pdf [file 12860_2016_111_MOESM2_ESM.pdf]

| Plasmid list    |                                                 | Origin        |
|-----------------|-------------------------------------------------|---------------|
| pAT253corrected | lacI <sup>**</sup> -GFP::HIS3                   | Dubarry, M    |
| pT1196          | pYiplac128TetRGFP::LEU2                         | Renshaw, M    |
| pYCG_YLR106c    | MDN1                                            | EUROSCARF     |
| pLAU43          | lacO non-repeating                              | Lau, I        |
| pLAU44          | tetO non-repeating                              | Lau, I        |
| pAG32           | HygR                                            | McCusker, J   |
| pAG25           | pFA6natMX4                                      | McCusker, J   |
| pAG25-3xGFP     | 3xGFP                                           | Tanaka, T. U. |
| pKS391          | mCherry::NAT                                    | Snaith, H     |
| pAFS135         | lacI-GFP::HIS3                                  | Straight, A   |
| pAFS59          | lacOx256                                        | Straight, A   |
| pRS306tetO224   | TetOx224                                        | Michaelis, C  |
| pRS416          | URA3                                            | Sikorski, R   |
| pFA6KanMX6      | KanR                                            | Wach, A       |
| pDD2193         | pAG25-TetR-3xGFP::NAT                           | This study    |
| pDD202          | tetO for MDN1                                   | This study    |
| pDD206          | Gal1p-MDN1                                      | This study    |
| pDD207          | MDN1-lacO                                       | This study    |
| pDD2244         | tetR-GFP-TetR-mCherry::ADE2 cl.2                | This study    |
| pDD2245         | GFP-lacI <sup>**</sup> -TetR-mCherry::ADE2 cl.1 | This study    |
| pDD2246         | TetO-UBP10::TRP1 cl.5.1 for DD1407 and DD1473   | This study    |
| pDD2247         | tetR-mCherry::NAT cl.3 for 1336                 | This study    |
| pDD2248         | tetR-mCherry::HygR cl.1 for 1413                | This study    |
| pDD249          | 42.3kb LacO-SSU72 cl.8                          | This study    |
| pDD250          | 42.3kb TetO-ZWF1 cl.6                           | This study    |
| pDD251          | 51.3kb LacO-INN1 cl.4 (and 91kb)                | This study    |
| pDD252          | 51.3kb TetO-SPC98 cl.1                          | This study    |
| pDD2577         | 64.8kb TetO-UBP10 cl. 5.1                       | This Study    |
| pDD253          | 64.8kb LacO-INN1 cl.1                           | This study    |
| pDD254          | 71kb LacO-SSU72 cl.1                            | This study    |
| pDD255          | 71kb TetO-UBP10 cl.1                            | This study    |
| pDD256          | 100.8kb TetO-OCA1 cl.15                         | This study    |
| pDD71/2580      | LacO::URA3                                      | This study    |
| pDD72/2581      | TetO::TRP1                                      | This study    |

## Yeast strains

| Strain | Genotype                                                                                                                       | Origin     | Total kb | Chr | tetO integration |        | lacO integration |        |
|--------|--------------------------------------------------------------------------------------------------------------------------------|------------|----------|-----|------------------|--------|------------------|--------|
|        |                                                                                                                                |            |          |     | Start            | End    | Start            | End    |
| DD1407 | Mata can1-100 his3-11,15 leu2-3,112 ura3-1 TetR-GFP-TetR-mCherry::ADE2 tetOx240::TRP1 at UBP10                                 | This study | NA       | XIV | UBP10            | MRPL19 | NA               | NA     |
| DD1413 | Mata ade2-1 can1-100 leu2-3,112 GFP-lacI::HIS3 tetR-mCherry::HygR lacOx256-Gal1p-MDN1-tetOx224 at URA3 locus                   | This study | 25.3     | V   | ura3             |        |                  | URA3   |
| DD1471 | Mata can1-100 his3-11,15 leu2-3,112 GFP-lacI** tetR-mCherry::ADE2 tetOx240-ZWF1::TRP1 lacOx240-SSU72::URA3                     | This study | 42.3     | XIV | ATG2             | ZWF1   | SSU72            | SNR19  |
| DD1472 | Mata can1-100 his3-11,15 leu2-3,112 GFP-lacI** tetR-mCherry::ADE2 tetOx240-SPC98::TRP1 lacOx240-INN1::URA3                     | This study | 51.3     | XIV | INN1             | RPC31  | SPC98            | ESBP6  |
| DD1473 | Mata can1-100 his3-11,15 leu2-3,112 GFP-lacI** tetR-mCherry::ADE2 tetOx240-UBP10::TRP1 lacOx240-INN1::URA3                     | This study | 64.8     | XIV | UBP10            | MRPL19 | INN1             | RPC31  |
| DD1336 | Mata ade2-1 can1-100 leu2-3,112 trp1-1 ura3-1 LacOx256 at 358kb tetOx224 at 298kb his3::GFP-lacI::HIS3 ade1::tetR-mCherry::Nat | This study | 70.6     | IV  | NUR1             | ASM4   | PSA1             | MCH1   |
| DD1474 | Mata can1-100 his3-11,15 leu2-3,112 GFP-lacI** tetR-mCherry::ADE2 tetOx240-UBP10::TRP1 lacOx240-SSU72::URA3                    | This study | 71       | XIV | SSU72            | SNR19  | UBP10            | MRPL19 |
| DD1475 | Mata can1-100 his3-11,15 leu2-3,112 GFP-lacI** tetR-mCherry::ADE2 tetOx240-OCA1::TRP1 lacOx240-INN1::URA3                      | This study | 100.8    | XIV | INN1             | RPC31  | MIC27            | OCA1   |
